# Supplementary material
Source: PubMed Central journal article supplement (PMC2481354)
Supplement: 0711106105_0711106105SI.pdf [file 0711106105_0711106105SI.pdf]

# Supporting Information

Onishi *et al.* 10.1073/pnas.0711106105

Tn + Treg (1:1) without OVA

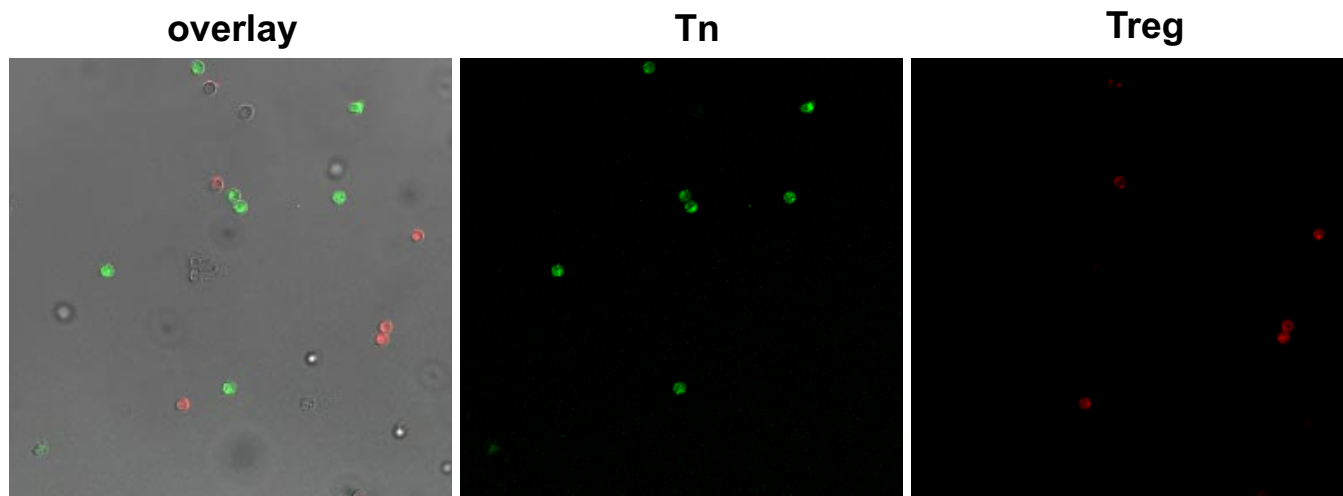

**Fig. S1.** Requirement of antigen for Treg aggregation. No aggregates were formed after the coculture of green-dye labeled naïve T cells, red-dye labeled regulatory T cells, and splenic DC in the absence of the OVA peptide.



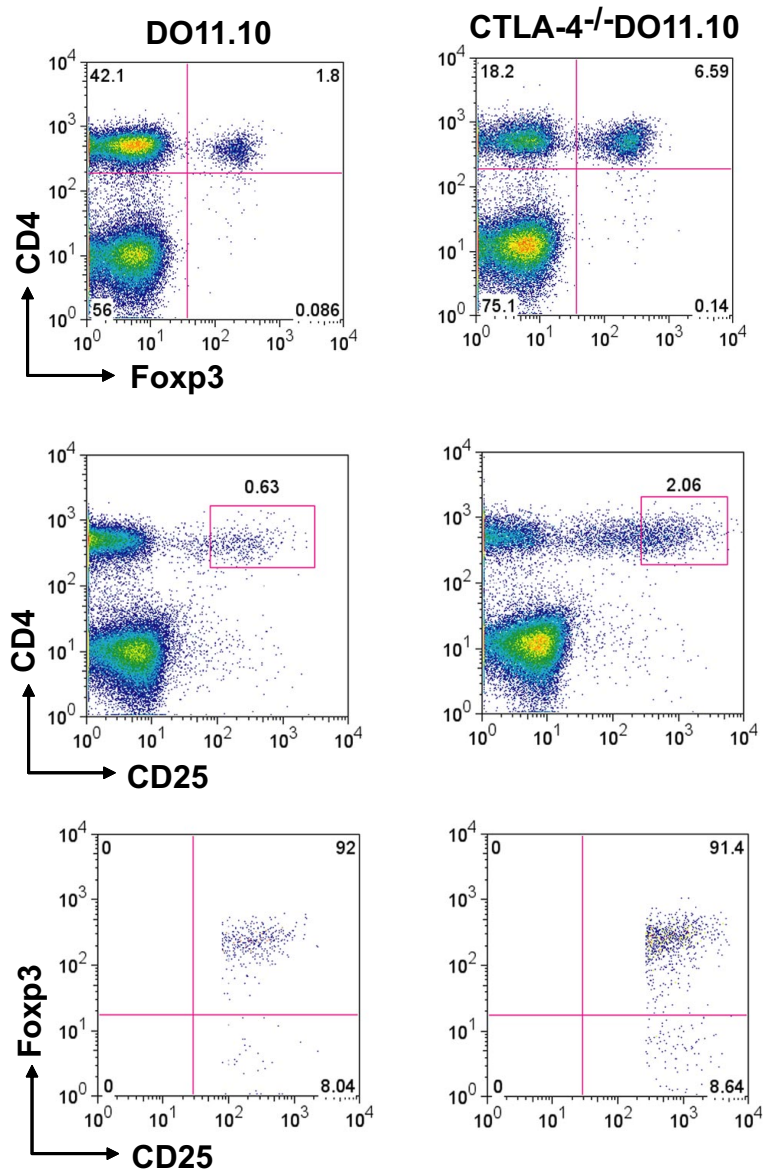

**Fig. S3.** Purity of Foxp3<sup>+</sup> Tregs. Spleen and lymph node cells from DO11.10 or CTLA-4<sup>-/-</sup> DO11.10 mice were stained for intracellular Foxp3 or cell surface CD25 (Top and Middle). Treg cells prepared as CD25<sup>high</sup> cells (rectangles, Middle) were stained for Foxp3 (Bottom), showing a comparable purity of Foxp3<sup>+</sup> cells from these mice. Anti-Foxp3 (FJK-16s) was purchased from eBioscience.

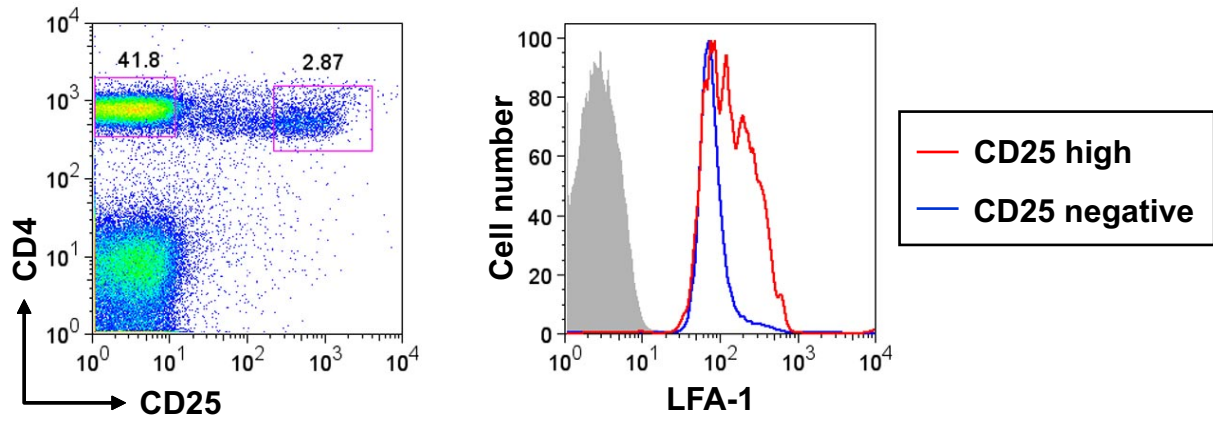

**Fig. S4.** Higher expression of LFA-1 on CD4<sup>+</sup>CD25<sup>+</sup> Tregs in normal mice. Spleen and Lymph node cells from BALB/c mice were stained with FITC anti-CD11a, PE anti-CD25, and APC anti-CD4.

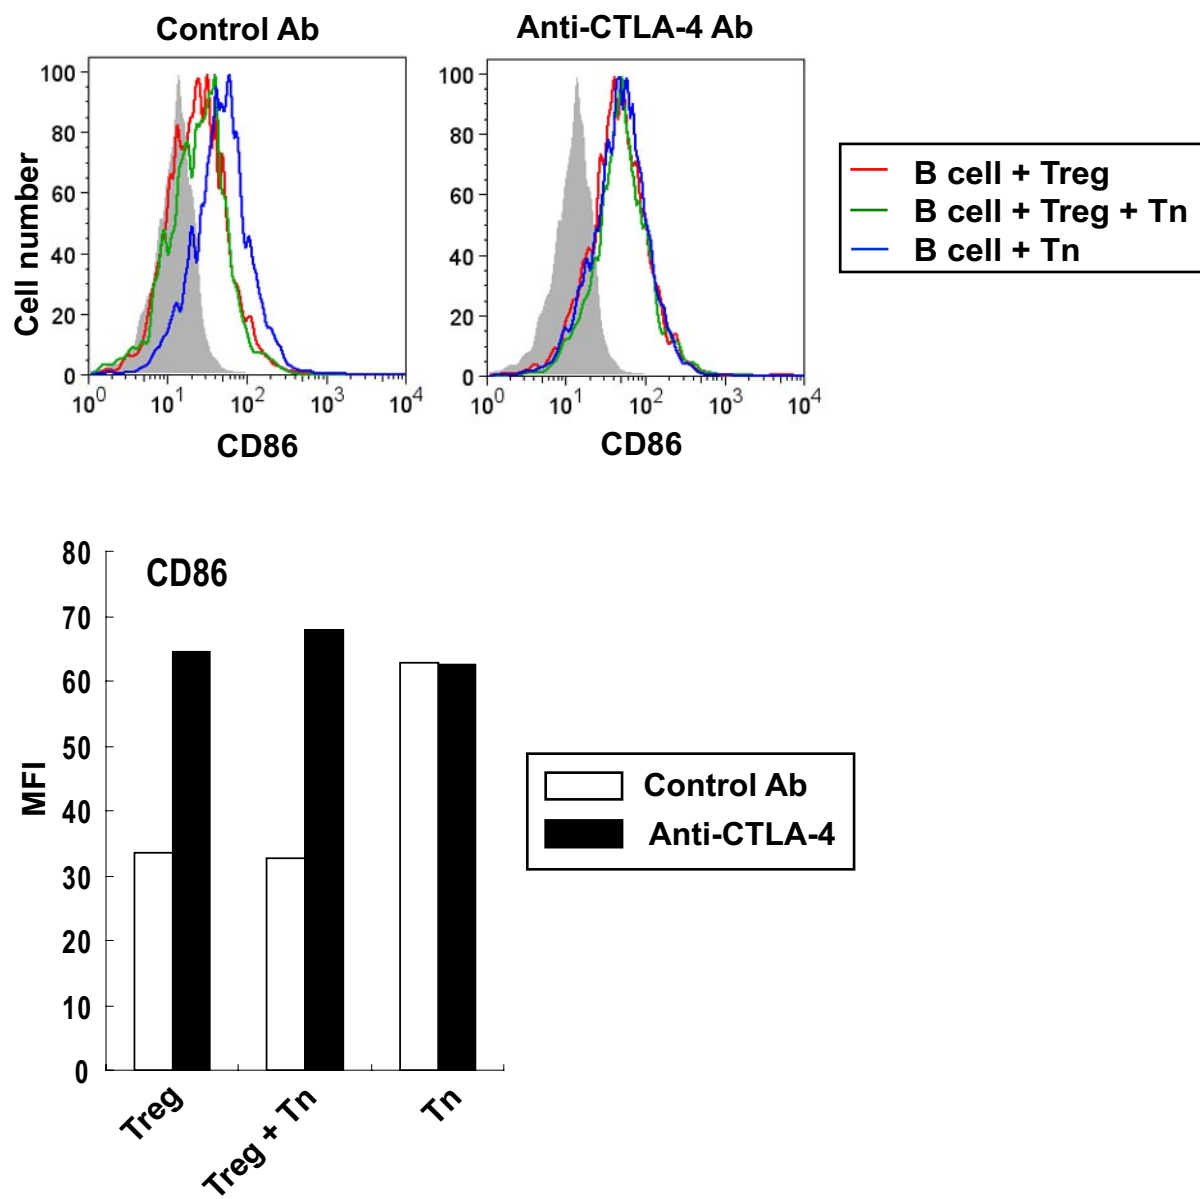

**Fig. S5.** Down-regulation of CD86 expression on B cells by Treg cells. Splenic B cells from BALB/c mice were cultured for 2 days with Tn or Treg cells from DO11.10 mice, or a mix of the two populations at 1:1 ratio, in the presence of 1  $\mu$ M OVA<sub>323-339</sub> and anti-CTLA-4 mAb or control Ab; then CD86 expression on B cells was assessed. A representative staining (*Upper*) and MFI of each B cell population (*Lower*) are shown.

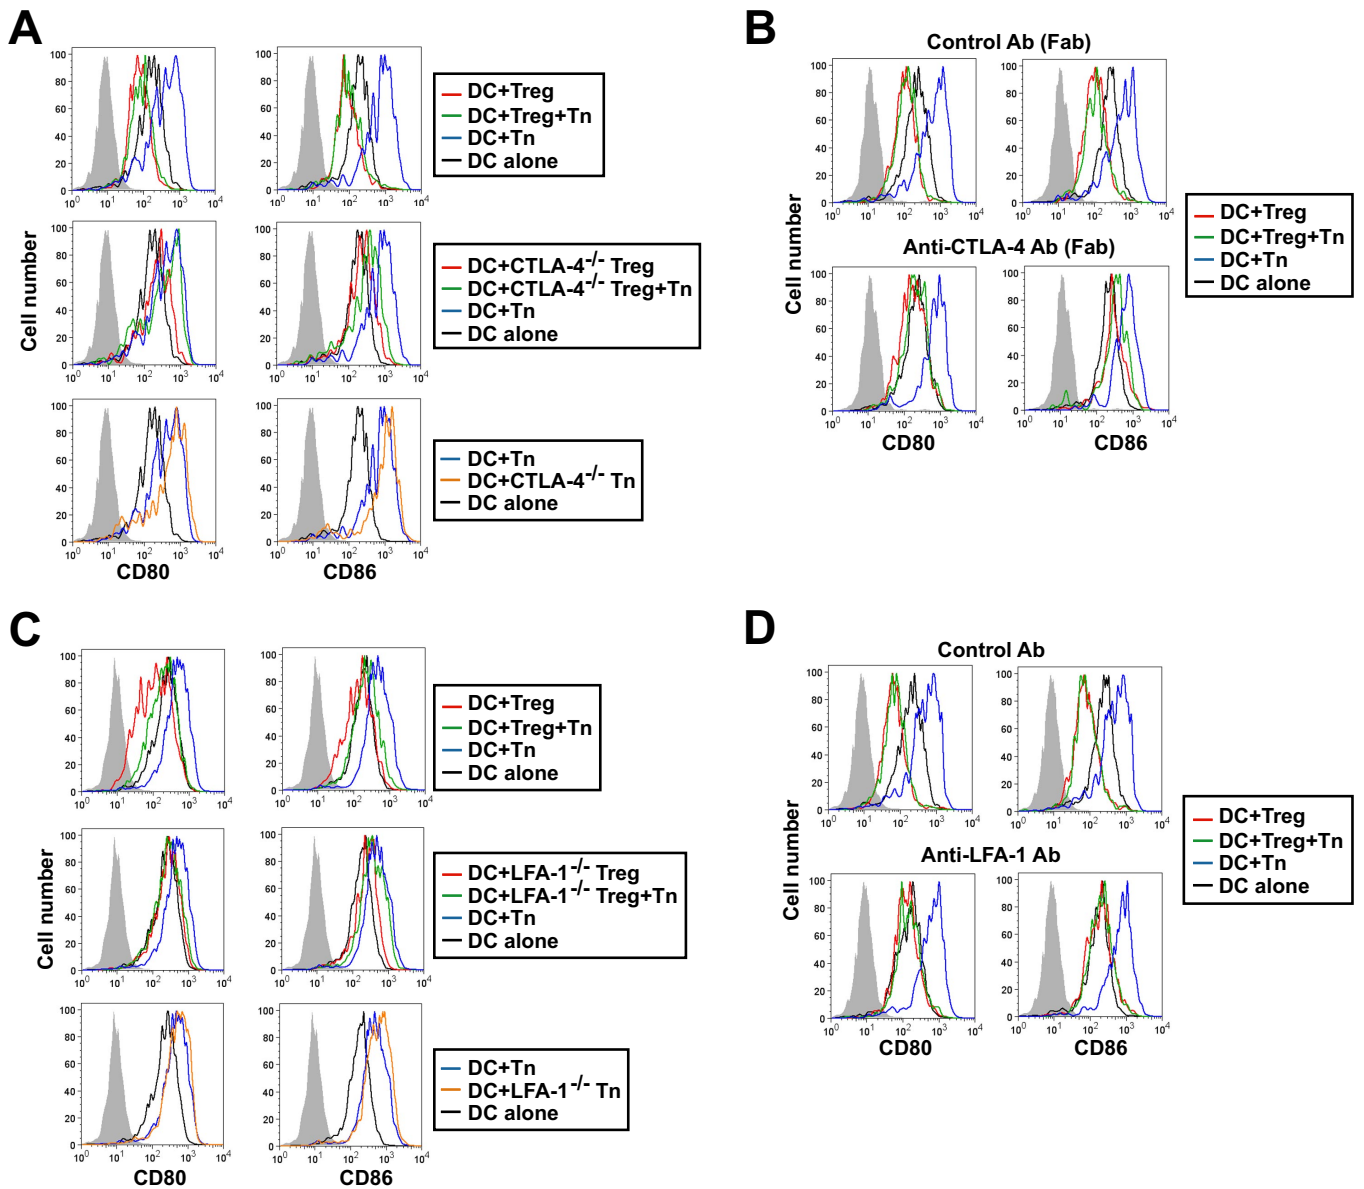

**Fig. S6.** CTLA-4- and LFA-1-dependent down-regulation of CD80 and CD86 expression on splenic DCs. Splenic DCs from BALB/c mice were cultured 2 days with Tn or Treg cells, or a mix of both populations at a 1:1 ratio, and then CD80 and CD86 expression on splenic DCs was determined. (A) Tn and Treg cells from DO11.10 or CTLA-4<sup>-/-</sup> DO11.10 mice were cultured with 1  $\mu$ M OVA<sub>323-339</sub>. (B) Tn and Treg cells from DO11.10 mice were cultured with 100  $\mu$ g/ml anti-CTLA-4 mAb (Fab) or control Ab (Fab). (C) Tn and Treg cells from wild type or LFA-1<sup>-/-</sup> mice were cultured with 0.1  $\mu$ g/ml anti-CD3 mAb. (D) Tn and Treg cells from DO11.10 mice were cultured with 2  $\mu$ g/ml anti-LFA-1 mAb or control Ab. Results in A–D represent three independent experiments.

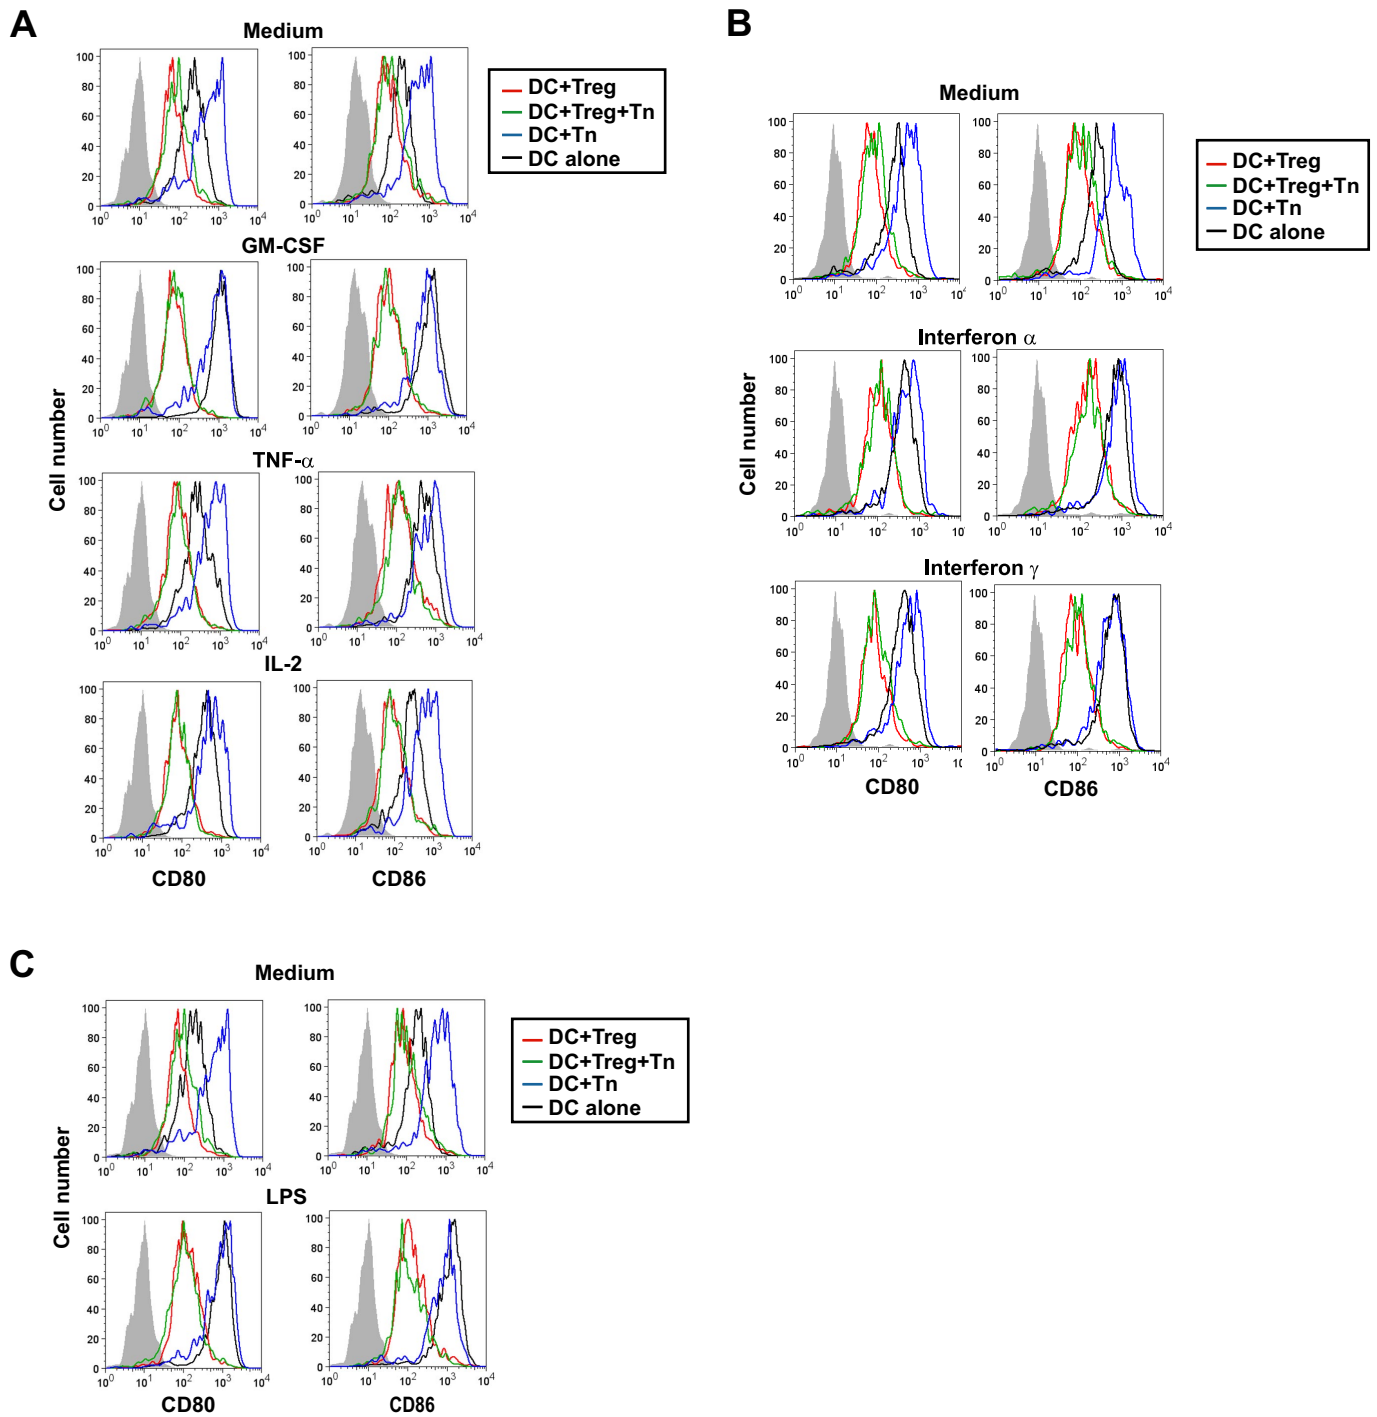

**Fig. S7.** The effects of cytokines and LPS on CD80/86 expression of Treg-cocultured splenic DCs. CD80 and CD86 expression on BALB/c splenic DCs was determined after coculture with Tn or Treg cells purified from DO11.10 mice, or with two populations mixed at a 1:1 ratio. The cells were stimulated with  $1 \mu\text{M}$  OVA<sub>323-339</sub> in the presence of GM-CSF (100 ng/ml), TNF- $\alpha$  (20 ng/ml), or IL-2 (200 units/ml) (A); IFN $\alpha$  (1,000 units/ml) or IFN $\gamma$  (100 ng/ml) (B); LPS (1  $\mu\text{g/ml}$ ) (C). Results in A–C represent three independent experiments.





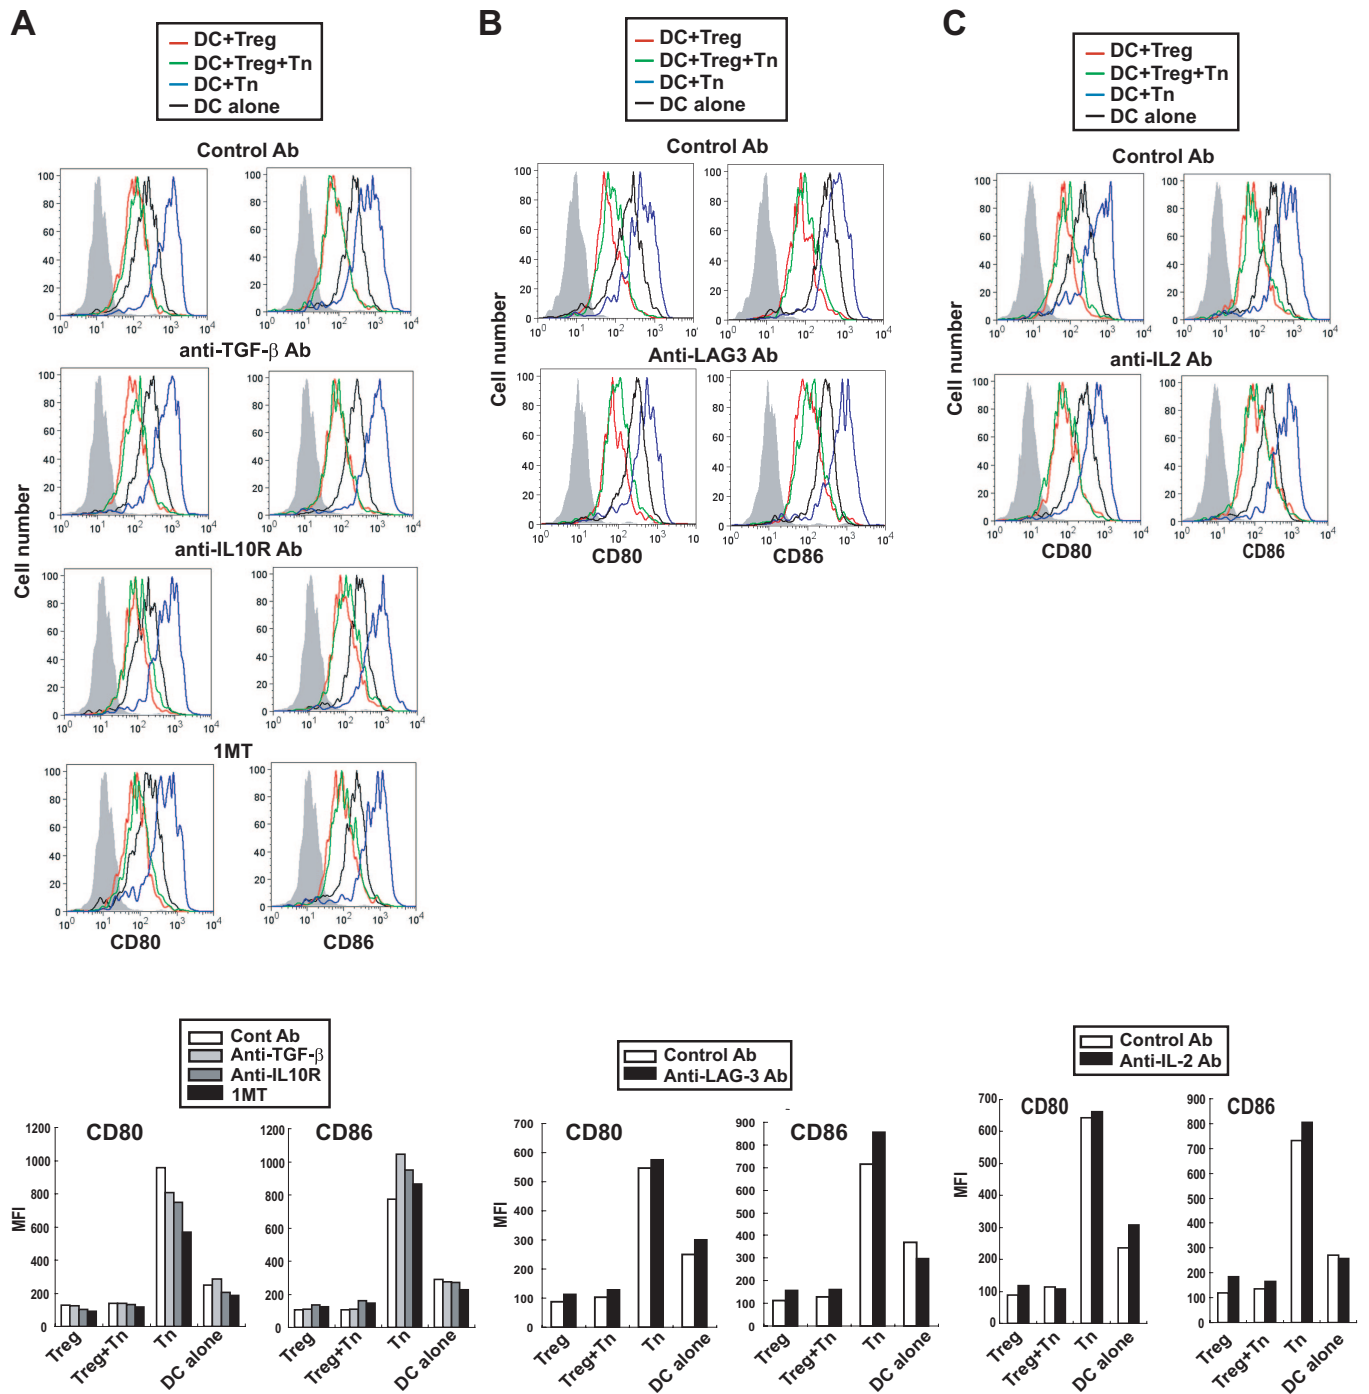

**Fig. S9.** The effects of biological reagents on CD80/86 expression of Treg-cocultured splenic DCs. CD80 and CD86 expression on BALB/c splenic DCs was determined after coculture with Tn or Treg cells purified from DO11.10 mice, or with two populations mixed at a 1:1 ratio. The cells were stimulated with 1  $\mu$ M OVA<sub>323-339</sub> in the presence of neutralizing anti-TGF- $\beta$  mAb (50  $\mu$ g/ml), anti-IL10R mAb (10  $\mu$ g/ml), or 1MT (100  $\mu$ M) for inhibition of IDO (A); anti-LAG-3 mAb (30  $\mu$ g/ml) or control Ab (B); neutralizing anti-IL-2 mAb (50  $\mu$ g/ml) or control Ab (C). Staining profile and MFI of each experiment are shown. Results in A–C represent three independent experiments.

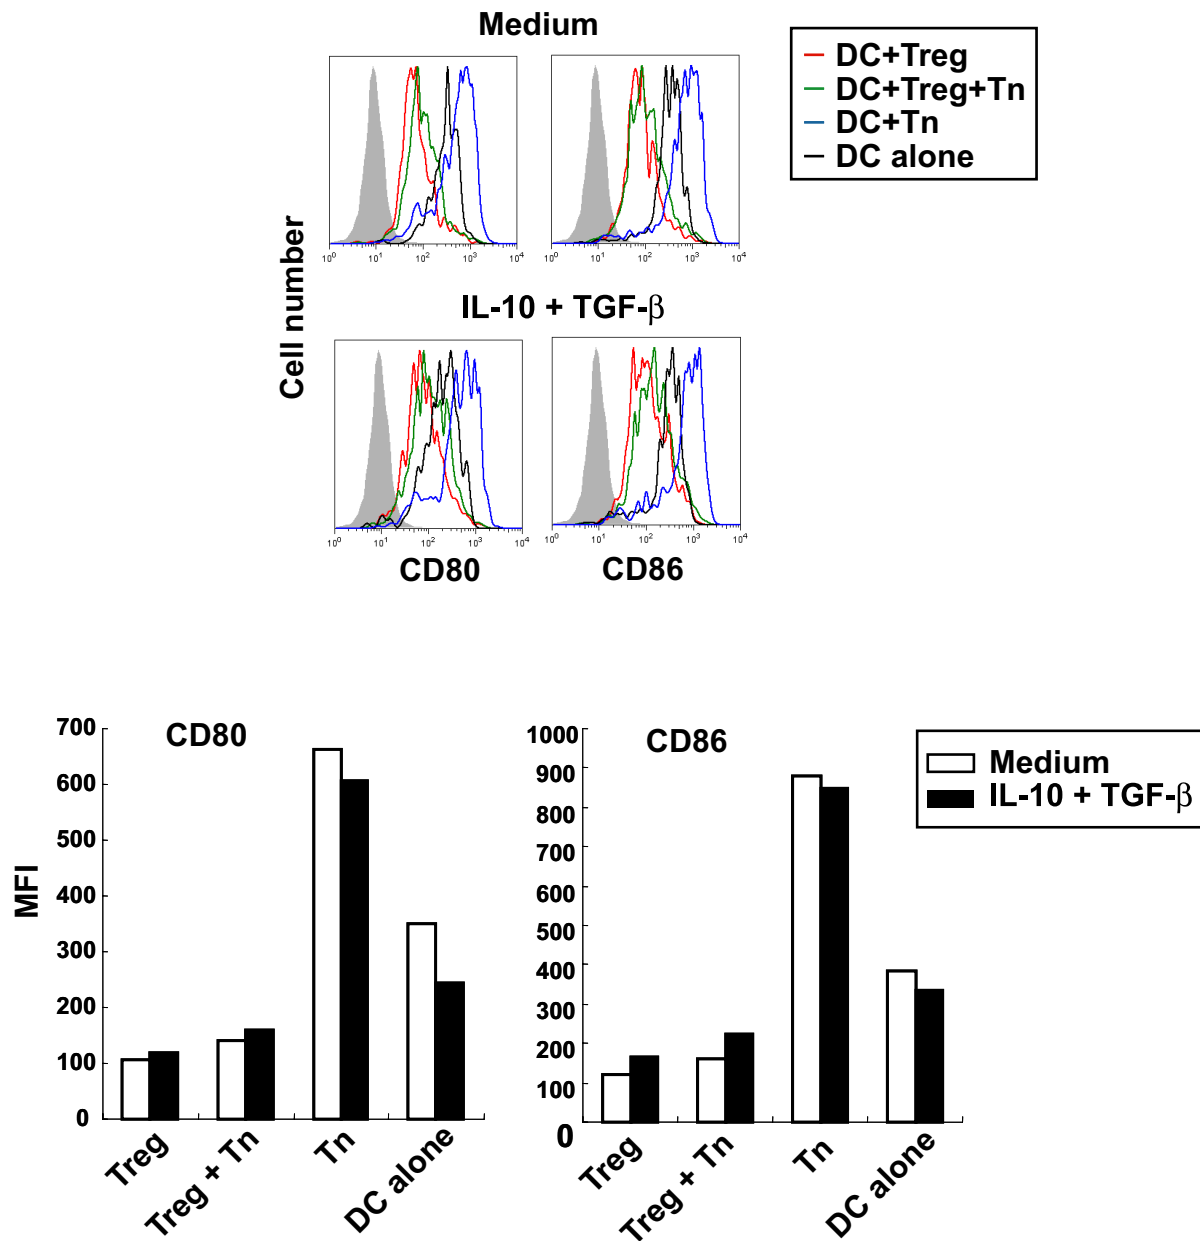

**Fig. S10.** The effects of TGF- $\beta$  and IL-10 on CD80/86 expression of Treg-cocultured splenic DCs. CD80 and CD86 expression on BALB/c splenic DCs was determined after coculture with Tn or Treg cells purified from DO11.10 mice, or with two populations mixed at a 1:1 ratio. The cells were stimulated with 1  $\mu$ M OVA<sub>323-339</sub> in the presence TGF- $\beta$  (20 ng/ml) and IL-10 (40 ng/ml). Results represent three independent experiments.



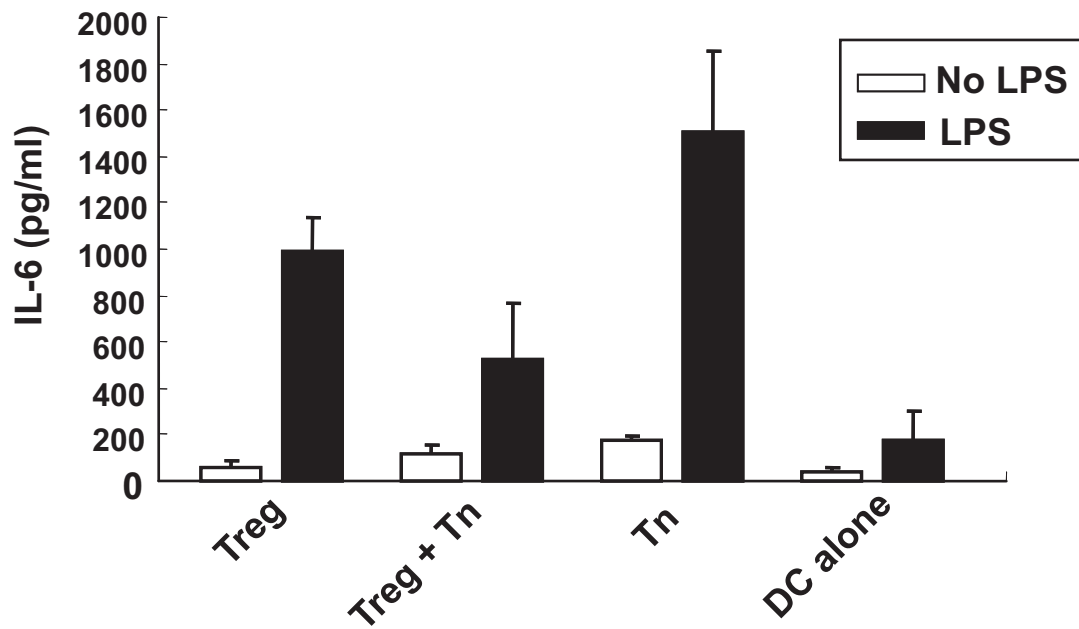

**Fig. S12.** Production of IL-6 in presence of LPS. The concentration of IL-6 in supernatant of the culture of DO Tn cells, DO Tregs, or a mix of the two populations in the presence of splenic DCs was measured by ELISA using Mouse IL-6 Ready-SET-Go! (eBioscience), with a detection limit of 4 pg/ml. The cells were stimulated for 2 days with 1  $\mu$ M OVA<sub>323-339</sub> in the presence of LPS (1  $\mu$ g/ml).
